# Supplementary material
Source: publisher figshare collection journal article supplement (https://sage.figshare.com/ndownloader/files/14080421)
Supplement: Supplementary file 1 [file 14080421]

Archive with 3 entries (3 files):
- Supplemental Material/Additional file 1_xyz12968ba599488.pdf
- Supplemental Material/Additional file 2_xyz12968921d01cd.pdf
- Supplemental Material/Additional file 3_xyz1296808fb416c.pdf
